# Supplementary material for: Trypacidin, a Spore-Borne Toxin from Aspergillus fumigatus, Is Cytotoxic to Lung Cells
Source: PubMed Central journal article supplement (PMC3272003; doi:10.1371/journal.pone.0029906), 2012-02-03
Supplement: pone.0029906.s002.pdf [file pone.0029906.s002.pdf]

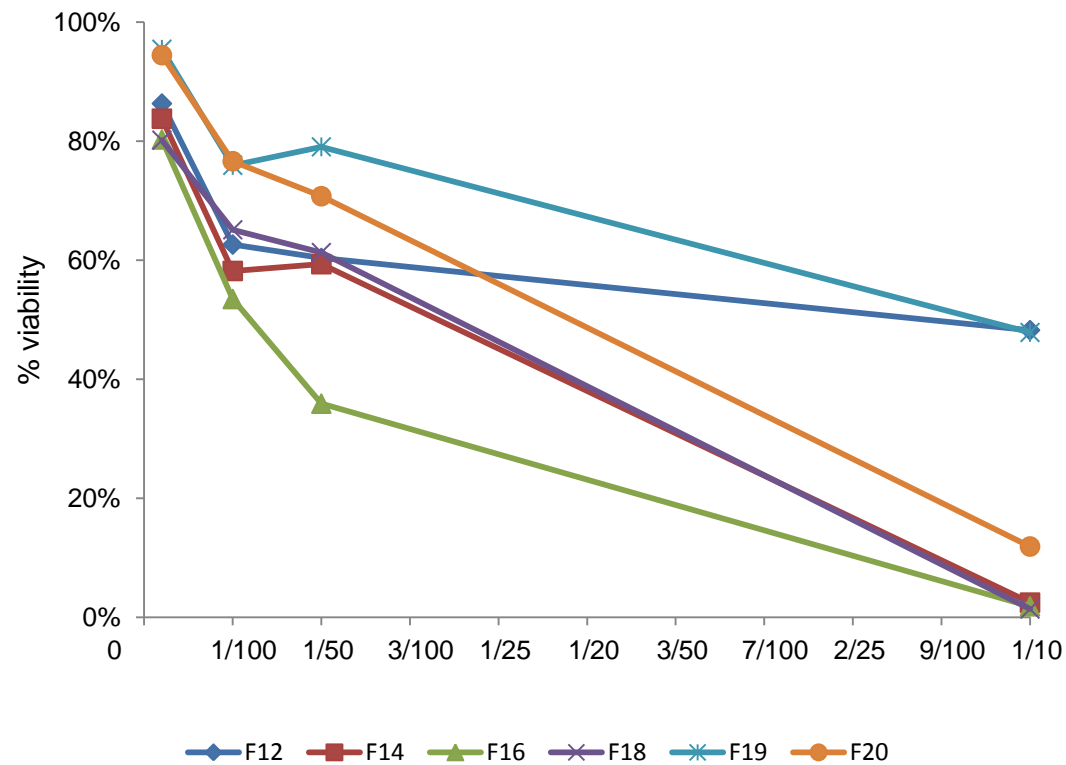

**Figure S2. Toxicity of fractions issued from flash chromatography.** The toxic effect of fractions F12, F14, F16, F18, F19, F20 were measured at four different dilutions in PBS-DMSO 12%: 1/10, 1/50, 1/100, 1/500. Ten  $\mu$ l were added to each well containing 100  $\mu$ l culture medium. The cells were exposed for 24 hours before measuring the cell viability as described in the Materials and Methods.
