# Supplementary material for: Trypacidin, a Spore-Borne Toxin from Aspergillus fumigatus, Is Cytotoxic to Lung Cells
Source: PubMed Central journal article supplement (PMC3272003; doi:10.1371/journal.pone.0029906), 2012-02-03
Supplement: pone.0029906.s004.pdf [file pone.0029906.s004.pdf]

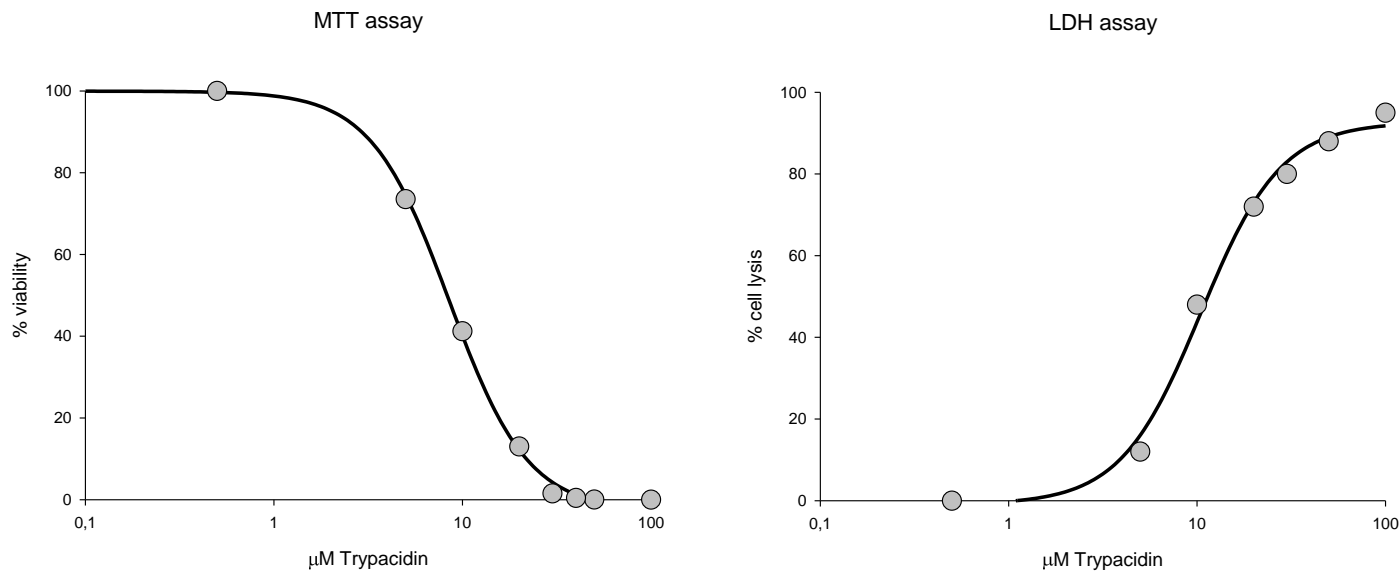

**Figure S4. Dose dependent effect of trypacidin on cell viability and cell lysis.**  $1 \times 10^4$  A549 cells were cultured for 24 hours in 96-well plates and then exposed to trypacidin for 24 hours. Cell viability and cell lysis were measured as described in Materials and Methods using the MTT and LDH assays. The toxin concentration triggering 50% toxic effect (IC50) was calculated using the software SigmaPlot.
